# Supplementary material for: Structural elucidation and anti-nonalcoholic fatty liver disease activity of Polygonatum cyrtonema Hua polysaccharide
Source: Royal Society of Chemistry journal article supplement (doi:10.1039/d2fo03384d), 2022-01-01
Supplement: d2fo03384d1.pdf [file d2fo03384d1.pdf]

## Supplementary data

### Structural elucidation and anti-nonalcoholic fatty liver disease activity of *Polygonatum cyrtoneura* Hua polysaccharide

Wei Liu <sup>a, 1</sup>, Taili Shao <sup>a, b, 1</sup>, Lei Tian <sup>a</sup>, Zhengrui Ren <sup>a</sup>, Lan Gao <sup>a</sup>, Zhiyan Tang <sup>a</sup>, Zheng Fang  
<sup>a</sup>, Pingchuan Yuan <sup>a, b</sup>, Chunyan Liu <sup>a, b</sup>, Jikun Li <sup>c</sup>, Guodong Wang <sup>a, b, \*</sup>, Jun Han <sup>a, b, \*</sup>

<sup>a</sup> Drug Research & Development Center, School of Pharmacy, Wannan Medical College,  
Wuhu 241002, China

<sup>b</sup> Anhui Provincial Engineering Research Center for Polysaccharide Drugs, Anhui  
Provincial Engineering Laboratory for Screening and Re-evaluation of Active Compounds  
of Herbal Medicines in Southern Anhui, Anhui Province Key Laboratory of Active  
Biological Macromolecules, Wuhu 241002, China

<sup>c</sup> School of Clinical Medicine, Wannan Medical College, Wuhu 241002, China

\* Corresponding authors

E-mail addresses: wangguodong@wnmc.edu.cn (Guodong Wang), hanjun@wnmc.edu.cn  
(Jun Han)

<sup>1</sup>These authors contributed equally to this work.

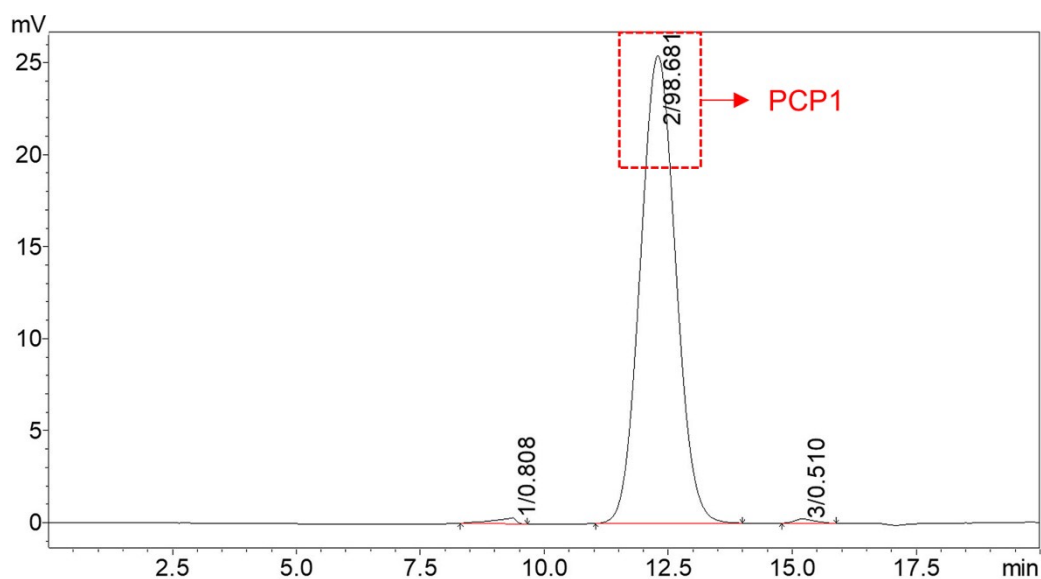

**Fig. S1.** High-performance gel permeation chromatography profile of PCP1. The symmetric narrow peak of PCP1 was ranked second in the figure, with an elution time of 12.17 min and a peak area ratio of 98.68%, indicating that PCP1 is a homogeneous polysaccharide.

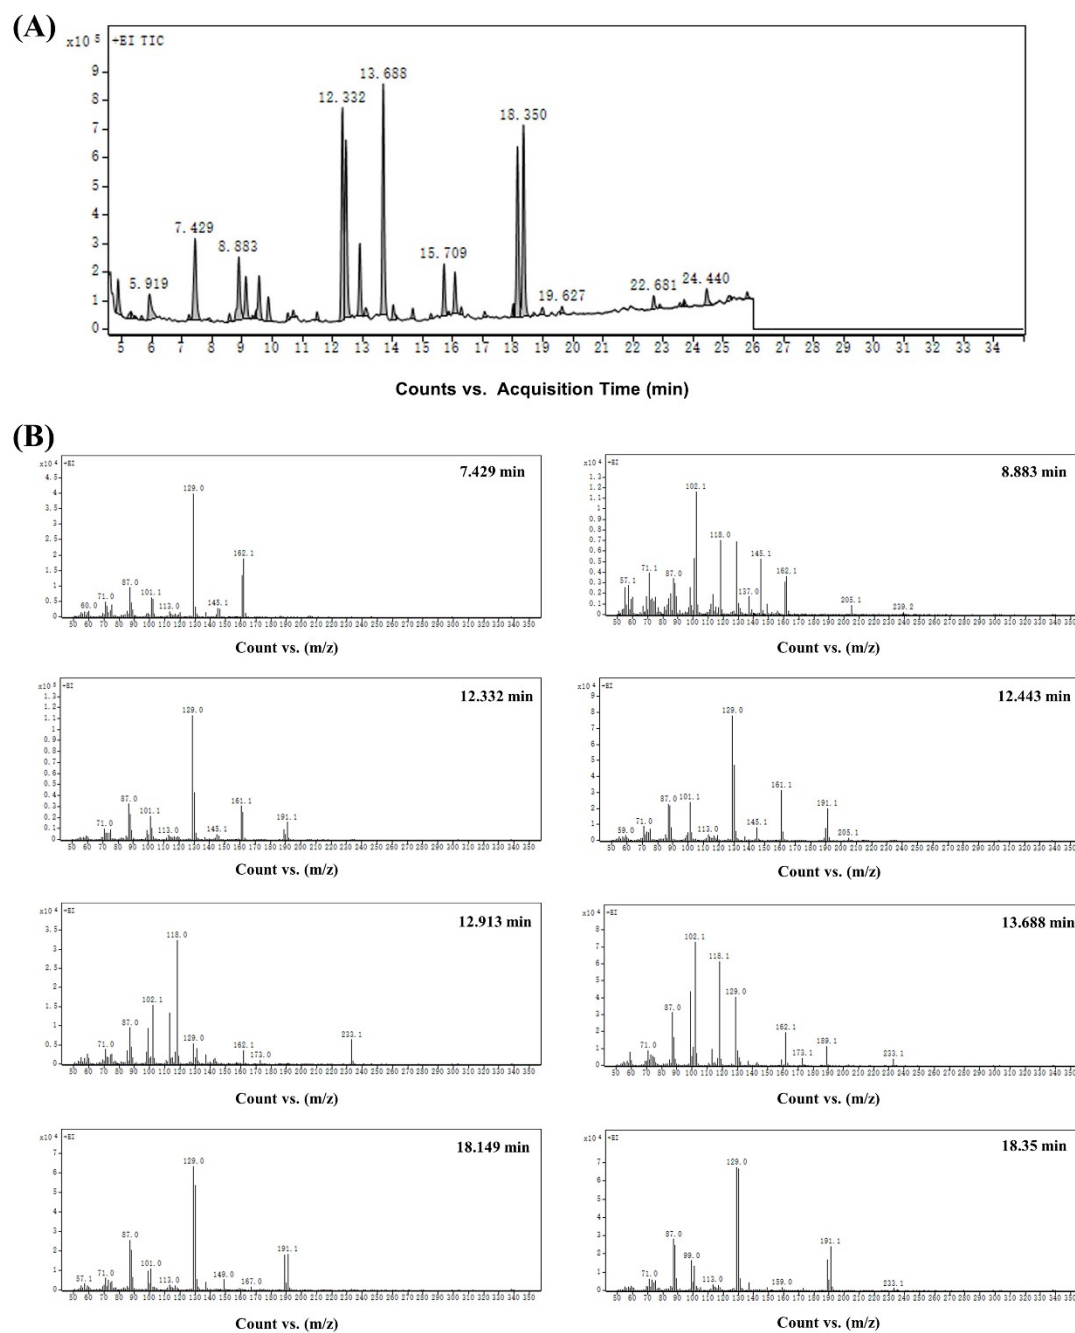

**Fig. S2.** Mass spectral signals of partially methylated alditol acetates of PCP1. (A) Total ion mass spectral signal. (B) Secondary mass spectral signal.
